# Supplementary material for: One-dimensional graphene nanoribbons hybridized with carbon nanotubes as cathode and anode interfacial layers for high performance solar cells
Source: Royal Society of Chemistry journal article supplement (doi:10.1039/c5ra04657b), 2015-01-01
Supplement: c5ra04657b1.pdf [file c5ra04657b1.pdf]

## Supporting information

### **One-dimension Graphene Nanoribbons Hybridized with Carbon Nanotubes as Cathode and Anode Interfacial Layers for High Performance Solar Cells**

Yong Zhang<sup>a</sup>, Yawen Liu<sup>a</sup>, Lie Chen<sup>a,b</sup>, Xiaotian Hu<sup>a</sup>, Lin Zhang<sup>a</sup>, Lin Hu<sup>a</sup>, Yiwang Chen<sup>\*a,b</sup>

<sup>a</sup>College of Chemistry/Institute of Polymers, Nanchang University, 999 Xuefu Avenue, Nanchang 330031, China

<sup>b</sup>Jiangxi Provincial Key Laboratory of New Energy Chemistry, Nanchang University, 999 Xuefu Avenue, Nanchang 330031, China

\*Corresponding author. Tel.: +86 791 83968703; fax: +86 791 83969561. E-mail: ywchen@ncu.edu.cn (Y. Chen).

**Instrument and Characteristics:** The thermogravimetric analysis (TGA) was carried out in N<sub>2</sub> on a TA instrument with a heating rate of 10 °C/min. The work functions of the modified cathode were investigated using a Kelvin probe (KP 6500 Digital Kelvin probe, McAllister Technical Services. Co., Ltd.). The samples were measured in a conditioned chamber where the O<sub>2</sub> level is < 25 ppm. The actual work function of the samples can be obtained through the equation:

$$WF = WF_0 + \Delta WF$$

Where WF is the sample work function, WF<sub>0</sub> is standard gold probe work function (5.1 eV), and ΔWF is the work function gap between samples and standard gold.

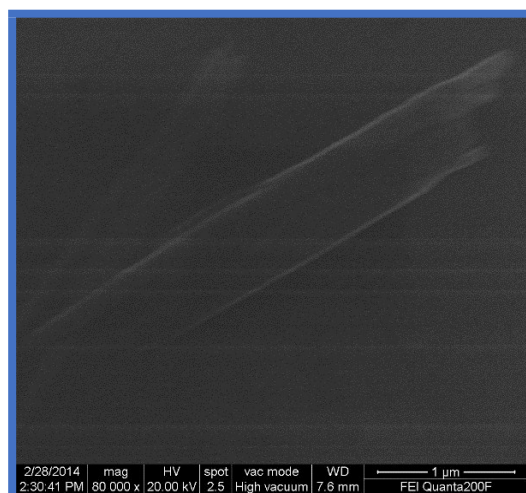

**Figure S1.** SEM image of GONR.

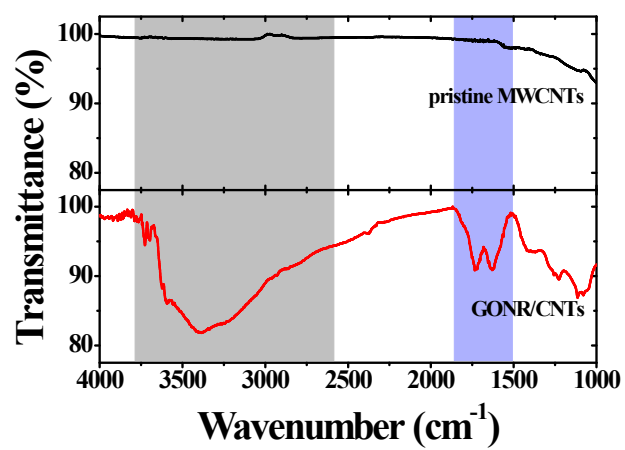

**Figure S2.** ATR-IR spectroscopy of the pristine MWCNTs and GONR/CNT.

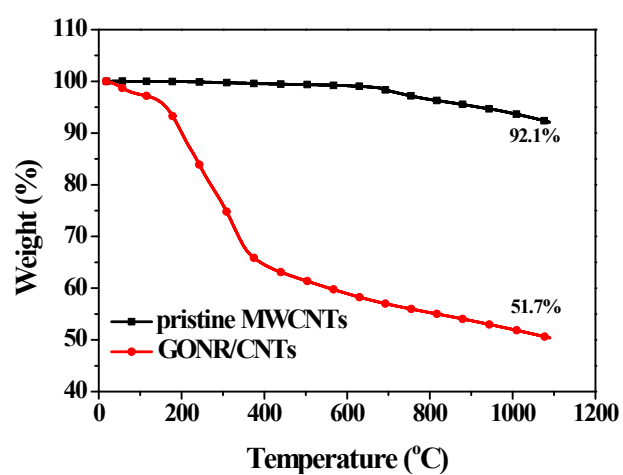

**Figure S3.** TGA weight loss of the pristine MWCNTs and GONR/CNT.

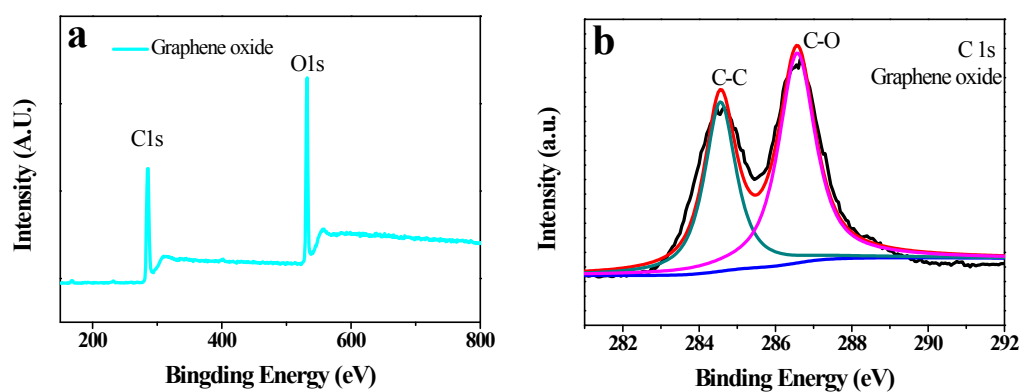

**Figure S4.** (a) XPS survey spectra of Graphene oxide. (b) XPS carbon 1s spectra of Graphene oxide.

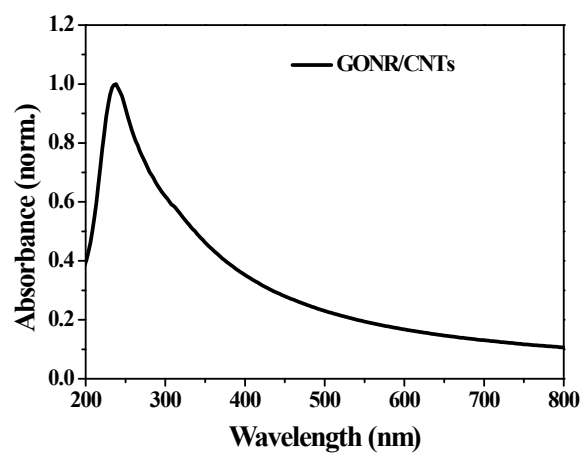

**Figure S5.** UV/Vis absorption spectrum of GONR/CNTs.

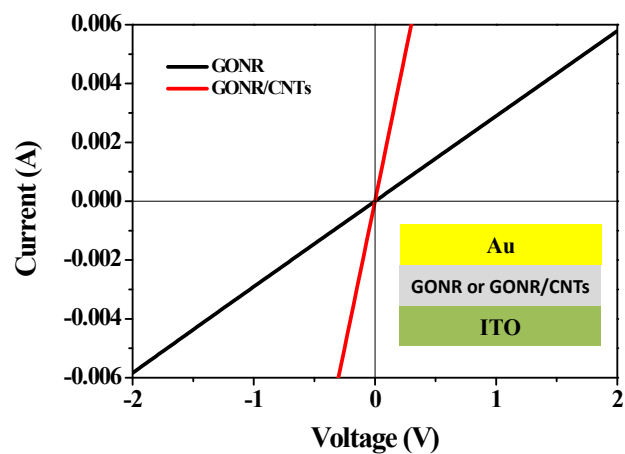

**Figure S6.** Electrical characteristics of ITO/GONR or GONR/CNTs (50 nm)/Au device.
